# Supplementary material for: Exosome secretion affects social motility in Trypanosoma brucei
Source: PubMed Central journal article supplement (PMC5352147; doi:10.1371/journal.ppat.1006245), 2017-03-03
Supplement: ppat.1006245.s002.pdf [file ppat.1006245.s002.pdf]

# A

## PD1b

Tb MVFS-THGIRVVYNTAN----VDRSLYAVVHCSDGKYAEVSKDHLNRLKFKIEKSSEEDI 55  
Tc MASF-TSCARILYNTN----VDRMHTIVHCSDGKYVEVFKAVADKCFKIEKVKEMIP 55  
Lm MADEGAIDIRLVLKGPNGEFGKVDRLYITVHCDDGKYIEVSKNYIKQCFIEEA-EGEIP 59

---

Tb EFDYPEAVLESLAQWTLKYGMDGVAVSSVTRPCYRNVQHVLKDDWEREFFTTRLMNDLN 115  
Tc EFEYPAAVLENLVCWTEHYGIDGFAESEIVRPCIYRNILHVLKKNKWDNGFFVSRILTSELN 115  
Lm EFGYPAAVLEHLIRWAVHYGVGDGHAASQLTRPCIYRDFSYVVTDKWDNDFNQRLCSPLN 119

---

Tb IMHYLQITINAAEKYEMKGFHDFLCVCLSCCLRNEEDTELVHKIMGLEDFVEIGPSDLDEA 175  
Tc IGHYLQITVNAAEKFNMGKGLHCFGLSCKFRSEDDAELIHKIMGLPSNVQPQEDIENV 175  
Lm QKHILLTMTAAEQFGMQLLDFMCI GLGCKLRGKDDNGITHEVMGLDKEMEITSEDLAEV 179

---

Tb ACRYTWLDQAIKPTVRR 192  
Tc TTRYPWLNAAIEPVVRK 192  
Lm SRDYWFDDAVKATTKK 196

# B

Tc --MSYRAYG---GGYRGRGGRGGGQHWQQTACEEDTF-RDPSN-----FNSGSP--- 45  
Tb --MYHRGYG---GHYRGRG-GGRGHSWHHNNAPMERGG-HMPSNNEGAAISSGSG-- 50  
Lm MSSYRGGSTRGRGHYRGGEGGFRGRGSYADAVSDGNMNRNEEQQRGERYRSQSSGDD 60

---

Tc -----YAE LRNYFNSVEGVNYGELKSLTNASFALS-----E 76  
Tb -----FSP LMDFFHSVEGRNYGELRSLTNETYQIS-----E 81  
Lm ESERGGGFGGNPQCHAGPPLPLVALESFLRDVDGSNYSQLKQLTGRTYSLTRQMKPDP 120

---

Tc SVRCTFLAIQSDPFAPGSQVRMSPCPFFQLQKILQCSELS-----CVPC 121  
Tb NVRCTFLSIQSDPFAPGSQVRLVCPCTFSLEKVLQTTDLAA-----ANPC 126  
Lm SVSIRFVRIQDPDFAPGSQVSVVPAPFATHALLHSAHSTPPGVTAALGNLLSPEDVAC 180

---

Tc RRIAAEDYILRSFHGHRGVARHHSALHVMRPSQHVLERSTVVLVNG---DREERG-- 176  
Tb RRVAEDFILLRSFHAGYRNGIPRRTSGAVQVLRPSQHVLERSTVGLVKA---HQKSGMQ 183  
Lm RRVAEDFILLRCVKGGFAAG--RNTSGAVQTIHQSQHVIAARSVRLDASEAHDSDGTS 238

---

Tc VEVHLFARVKLPGHGRRIDGHGAIRIFYDELLPIMERCVVGLDEEALYQHVT CVHDQEHL 236  
Tb AEIEIFARVKLPGHGRRIDGHGAIDIFYNELVPLEQC VVGLNEEDLHQHVICVHDQEVL 243  
Lm GWIHVYFRVKLPGHGRRIDGRRIQQILFSEVLPVFEQENVLRCDHHALWAHVTCVHDQEWL 298

**A-loop**

Tc RGE LRAAGCVAFVANGSVLPRESGNSDRPLG-KGAVPFVSPASLERTFHLPHSGATVTGM 295  
Tb RSNLLGAGYVAFVANGAILPRDAGNSDKPLR-DNAVPFQSPKSLCSFTLPHSGKTITGM 302  
Lm RAQLREWGFAAFIADGAILPRATGNSDKPLSGPSVVAFSPEDTLRHTFQLPYSGRAISGA 358

**Walker A**

Tc GLPHGLIILIAGGGFHGKSTLLRALEVGIYNHVPDDGRVYVTVDP TAVKIRAEDRRSINGV 355  
Tb GLPPGLTLLIAGGGFHGKSTLLRALEVGIYNHVPDDGRTYVVVDPTAVKIRAEDRRSVHGV 362  
Lm GLPHGLTLLIAGGGFHGKSTLLRALELGVYNHVPDDGRTFVVVDPTAVKIRAEDRRAVHGT 418

**Q loop motif C                      Walker B                      D loop**

Tc DISPFINNLPFQKTTTSFVTS DASGSTSQAANIMEALELGSRLLLLEDTCATNLMYRDD 415  
Tb DISPFINNLPFGKTTNFVTDASGSTSQAANIMEALELGSQ LLLLEDTCATNLMYRDA 422  
Lm DISPFITNLPYRDNTTAFVTDASGSTSQAANIMEALELGS TLLLEDTSATNFMYRDP 478

**H**

Tc LMQQLVPREQEPIPFVDRVTDLIQNHGVSSIMVIGGSGQYFP HATVTLVMNAYKAFDCS 475  
Tb LMQMLVPRAEPIPFVERVADLSQNHGVSSIMVIGGSGQYFPQARVVLVMNAYQISDCT 482  
Lm LMEQLVPRTEPIPCFVHRVRLMYHHGVSSIMVIGGSGQYFP MADVLLNAYKVTDAT 538

---

Tc ERAKEISR-----TFMSSVQPPKKAISAFVSPMQRQFDGSGTFSTVHCRRGHD---- 523  
Tb KEAKEIASN-----SSLPALNPPGDTASVFI PDVNRCFDPDGSFTTVRRRRGRE---- 531  
Lm AQAIAIAAQSVGRGGVGLVESAAP--ATSAFRLPPRRSFVYADTFGR LGSQQQQYHH 596

---

Tc -----SIK VSGVGVDSIRFAEETIDLSLVEQIVEEGQVN AIAQCLAMLYDGEEN 572  
Tb -----GTVK VSGIGTESIRFSEETIDLSMVEQIVEEGQVN AIAQCLALLYDGEPR 580  
Lm HHGYGYGGSGRGIKISGSGIEHIRIADED INVTLL EQLVEEGQLN AIAQCLAMLYDSGSA 656

---

Tc GIRTILAKGK-----SLKLLYSPPGGSEPRNVPFYSEFAALIEGCD AALRDARLEAR 624  
Tb IVPMTTKGG-----ALTQLPSPPGGVCEI-QRGKFN SNFSSMTAGCCSHQHDRLELR 632  
Lm AAAEQREAEAPRSRYPPSLSKALSVDA AAAAGAPASSLDFGR LNVNCEGR LRQARLELQ 716

Tc TPSCYLPRGFTSAARRFEIGAALNRLRTLRLTAAMK 661  
 Tb TPSCYLPRGFTSARHIEIGAALNRLRTLRTVTAKR- 668  
 Lm TASCYLPVGFTALPRVFEIGAALNRLRTLVTSCK--- 750

## C

### SAM 2

Tb MS--SAVDSLLVRLKIPDLIPKFRMNVDRIISLRKLSEELRTAVPDDQQRNRIIEAIK 58  
 Tc MN--SAVDSLLMRLKLSDLIPKFKEMKLDRIVNLRLKSEELREAVPDDEQRNLIHAIK 58  
 Lm MSQQNAVEALLARLQMGDTIPAFQSMGVDRIVSLRKMSEALSQAVPDPEQRQALMDAIE 60

Tb NRGSSSE-KRTOAPAAASINPPRSTD-DGGRGMSYPRG--APRGGGPVVRGRGRGGTGSAGE 114  
 Tc NRGTHE-KRQSQAAANINPPRNAD-DGGRVGMSPFRG--STRGG-MGRGVSRGGGGGGST 113  
 Lm SRGHLQSRRAGPPAQPHPPRSADADFARGMDEGRGGYAPRGD-RGGRIARGGRGGG-- 117

### ZF

Tb GGFHSGSNANMFPSRQVVCNHFLNGD-CRYGDSCRYSHN----KALCQ-EAAESVPRR 168  
 Tc N--NNSNSETNTSFPGRQRACNHFFSGE-CKFGDRCRYSHD----KEIYDREMAENGP RR 166  
 Lm ---RGAGAPNG---DGAARVCRHVFTPEGCKYGDKCRYSHDENDRRRAQEVPTGSGMAQR 171

### KH

Tb NHDATSLSEDFSETCIIPTHRIKYLLANRADRLRSIHSKNRTHNKSQFHIDPTIEKFEV 228  
 Tc PNDVSVKPKDYSEVCEIPTHRIKFLLAKKAERLQIHIQNHTHNEPFKRVDNVEKFEV 226  
 Lm SLERPPPNFKFSIEVEIPTERIKYLLGSQNNMFINETCGTYNERFDHVDEKEETFTIR 231

Tb IYGADQQSVQESKMLLACIGVTRREEQKNRVQYTMNELSSNQRAAKFLAACNMKNEGTV 288  
 Tc VYGPDPQSVLQSKMILSYVGVTKQEEQKSRLQY TINELSSNQHAAKLLAACNLIKNEGTA 286  
 Lm ILGGSEEAINKAKEMLLSAGVKREEEKDRFQYAVNELDANTHAARLFAACNTKPKDIT 291

Tb RELSEASLRNIISFFRFEKQDDIRHFVWNTN-SEHSKLDIIANIVAQLQGVQAIMFCDDQK 347  
 Tc RELSEETLRSIISFFRFEKQDDVRFHYLVN-HDRVKLDKVAKIVAQLRQVQAIMFSDQK 345  
 Lm RHLSDSIMRNIVSSEHFVREQEVRFHYMYTSSSDKDKLEMVSKIVSOLKGVQAILFCDDQK 351

### Helicase

Tb RVVDMASKVASKITRYFNGVSPFLHRAIPKEERMKMLQTFKDGKPNENGI RERLLVTNED 407  
 Tc RVMEMSKVASKIARFFNGVTPFLHREIPKEERMILQEFKDGGENESGIRERLLITNED 405  
 Lm RVEEMCKGSQRIARHFNGVEPQFVYRQLSKEDRMALERFKKGVENENGVQRLLVTNED 411

Tb YAKLARKTIVPYVNLVINYSVPRSEYYLLQSLVAGRSDFVGVSI VCVFPHEQSLFQELQ 467  
 Tc YAKLARKTILPYVNLVINYVPRTEYYLLQSLVAGRSDFVGVSI LCVSPYDQSTFHELQ 465  
 Lm YAKLARKTILPYVNLVINYSVPRAEYYVLQSQVAGRQGTIGASFLCVSNYEEALFRELE 471

Tb RNIPFEELEEEGNFKDAAVKLVYDVTVEPLTGEDADPPSNWHEQLPKTL----- 517  
 Tc QKIVFTAI EESDFMETAVQLVYDVTANPLTDEADPPRDWKEKLEPKNAS A----- 517  
 Lm KNIQFERFEDENHFRTAVELSYDTTAQPLTPEDADPPADWREHLNPKKPRQNFGRKRR 529

**S2 Fig.** Sequence alignments were performed using ClustalW multiple sequence alignment program (<http://www.genome.jp/tools/clustalw/>). The alignment with the trypanosomatid species; *Trypanosoma brucei* (Tb), *Trypanosoma cruzi* (Tc), and *Leishmania major* (Lm), are presented. Residues shown in red, blue and green represent identity, similarity and weak similarity, respectively. The sequences were obtained from GeneDB. (A) Sequence alignment of *T. brucei* p22 (Tb927.7.7460) with its homologues. The PD1b (protein disulfide isomerase) is indicated. (B) Sequence alignment of *T. brucei* p72 ATPase (Tb927.3.1590) with its homologues. (C) Sequence alignment of *T. brucei* ZC3H41 (Tb927.11.1980) with its homologues. The different domains are indicated; SAM, sterile alpha motif; ZF, zinc finger; KH, K homology domain.
