# Supplementary material for: Exosome secretion affects social motility in Trypanosoma brucei
Source: PubMed Central journal article supplement (PMC5352147; doi:10.1371/journal.ppat.1006245), 2017-03-03
Supplement: ppat.1006245.s003.pdf [file ppat.1006245.s003.pdf]

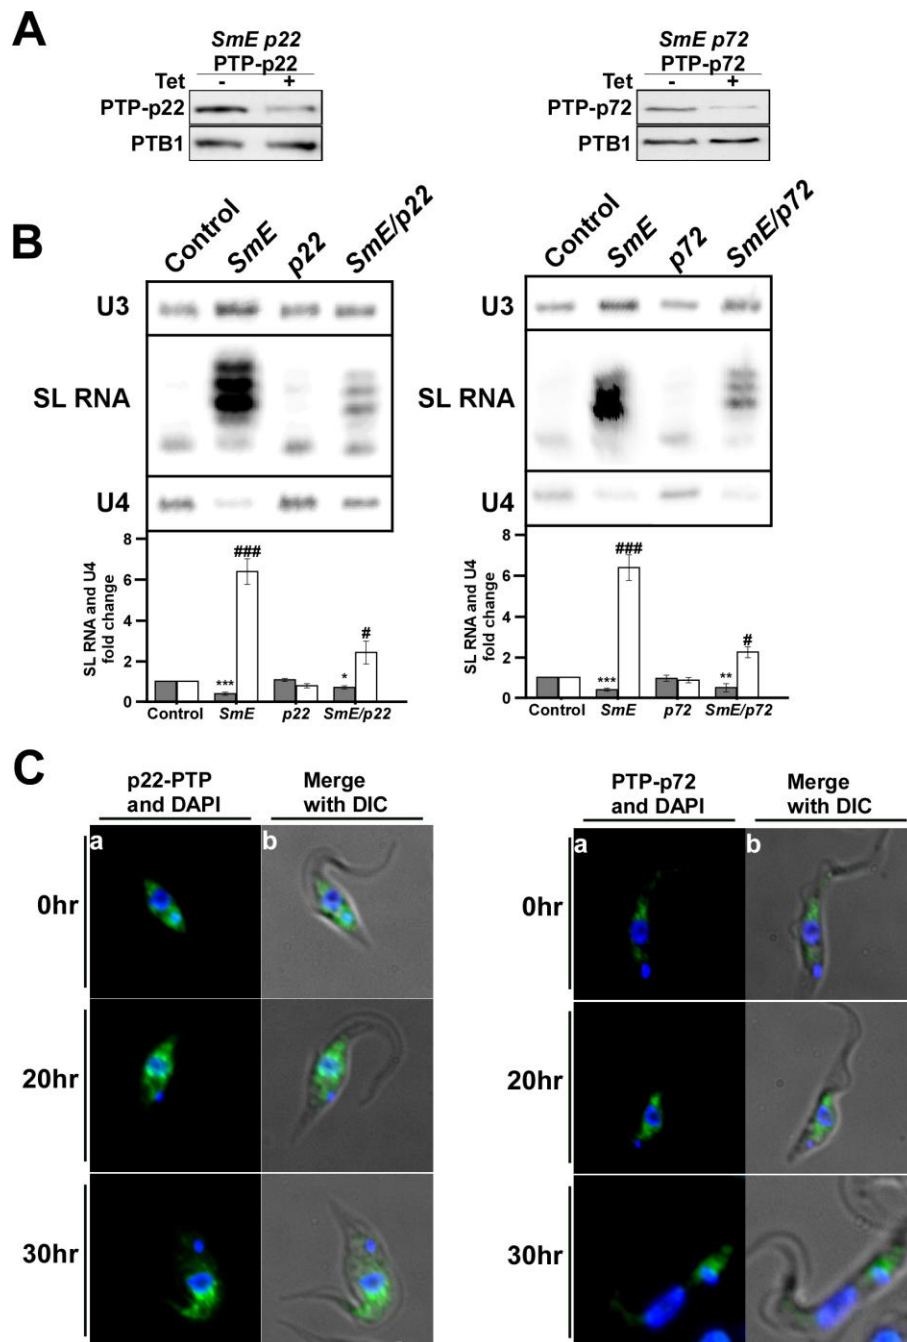

**S3 Fig. Co-silencing of *SmE* with either *p22* or *p72*.** (A) Western analysis. Cells expressing the T7 opposing silencing constructs for *SmE/p22* and tagged PTP-p22 construct, or *SmE/p72* with the PTP-p72 tagged construct, were silenced for 48 hrs. Cells ( $\sim 10^6$  cells/ lane) were subjected to western analysis using PTB1 antibodies, which also recognize the tagged protein. (B) The silencing of *p22* and *p72* affect SL RNP-C stability. Cells carrying the *SmE/p22* and *SmE/p72* silencing constructs were induced for 48 hrs. RNA (10  $\mu$ g of total RNA) was subjected to primer extension with primers specific to SL RNA, U4, and U3 snoRNAs (listed in S2 Table). The extension products were separated on a 6% denaturing gel. The identity of the cell line and the

position of the modified cap are indicated. The statistical analysis represents the mean  $\pm$  s.e.m of quantification from three independent experiments.  $**P < 0.01$ , and  $***P < 0.005$  compared to -Tet, using Student's *t*-test. **(C)** Localization of *p22* and *p72* before and after silencing. Cells expressing PTP-*p72* and the *SmDI* silencing construct, either un-induced or induced for the indicated times were fixed, and fluorescence was monitored. Nuclei were stained with DAPI.
