# Supplementary material for: Exosome secretion affects social motility in Trypanosoma brucei
Source: PubMed Central journal article supplement (PMC5352147; doi:10.1371/journal.ppat.1006245), 2017-03-03
Supplement: ppat.1006245.s006.pdf [file ppat.1006245.s006.pdf]

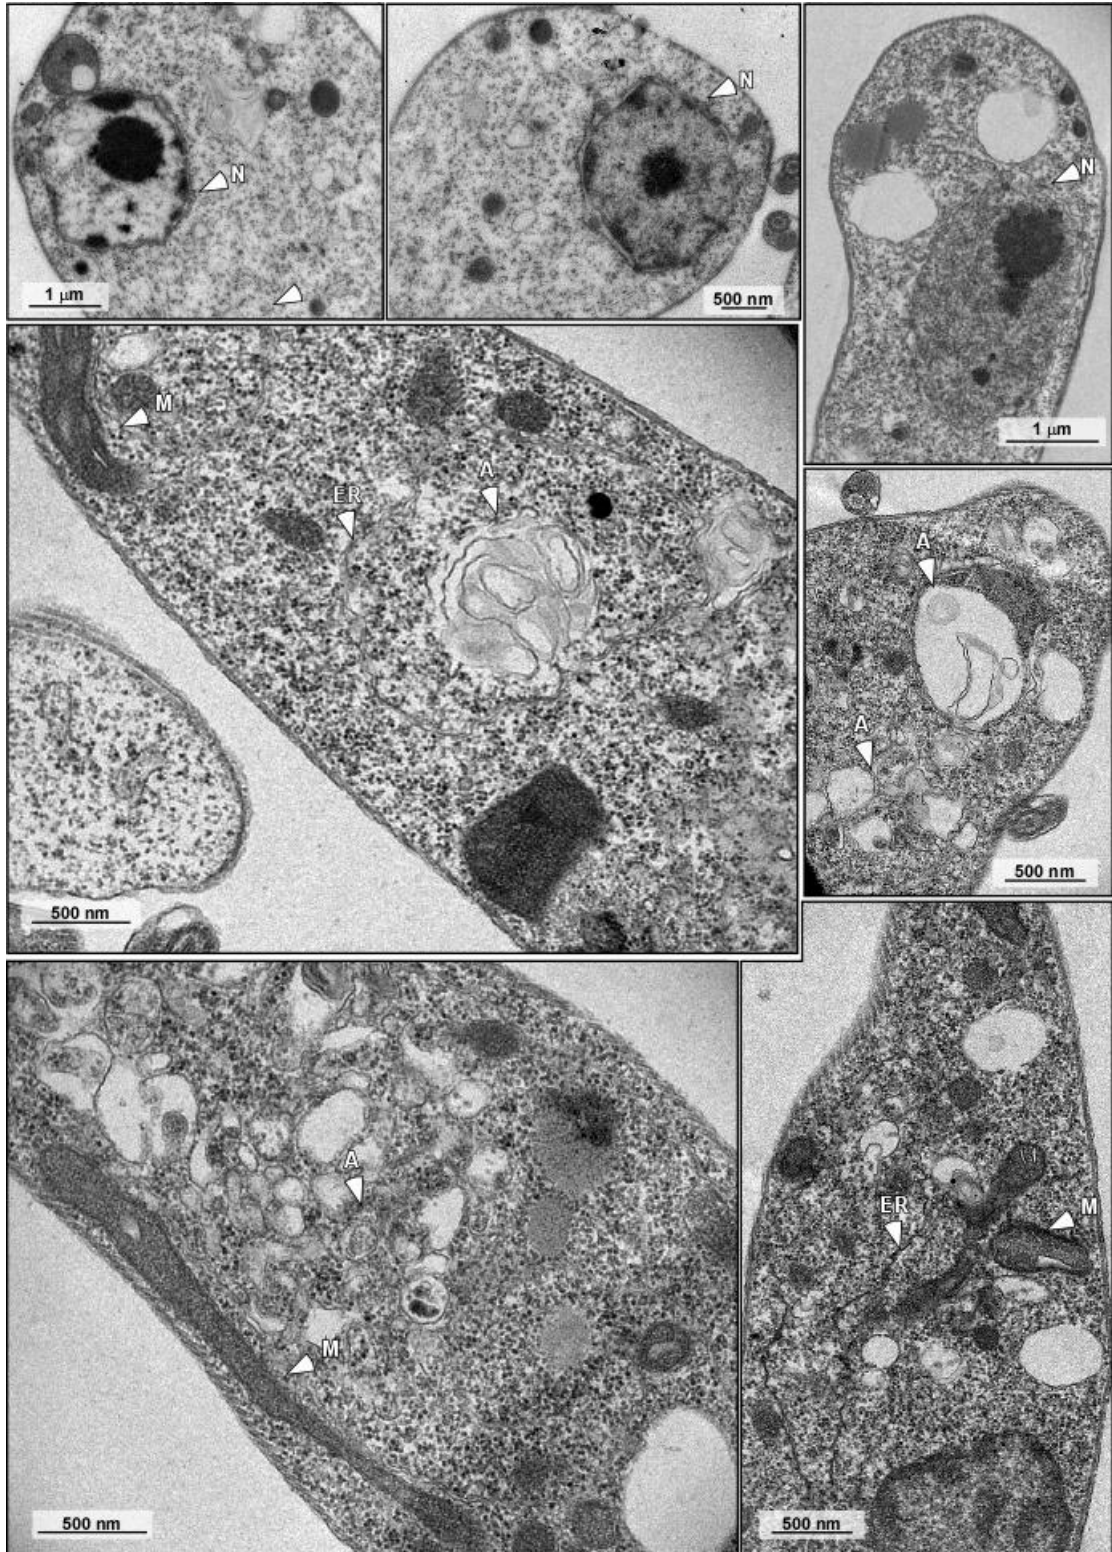

**S6 Fig. TEM of SEC63 silenced cells.** Cells were fixed after 2 days of silencing, and ultra-thin sections were prepared. The different ultra-structures are indicated. M, mitochondrion; ER, endoplasmic reticulum; A, double-membrane autophagosome; Scale bars are indicated.
