# Supplementary material for: Exosome secretion affects social motility in Trypanosoma brucei
Source: PubMed Central journal article supplement (PMC5352147; doi:10.1371/journal.ppat.1006245), 2017-03-03
Supplement: ppat.1006245.s007.pdf [file ppat.1006245.s007.pdf]

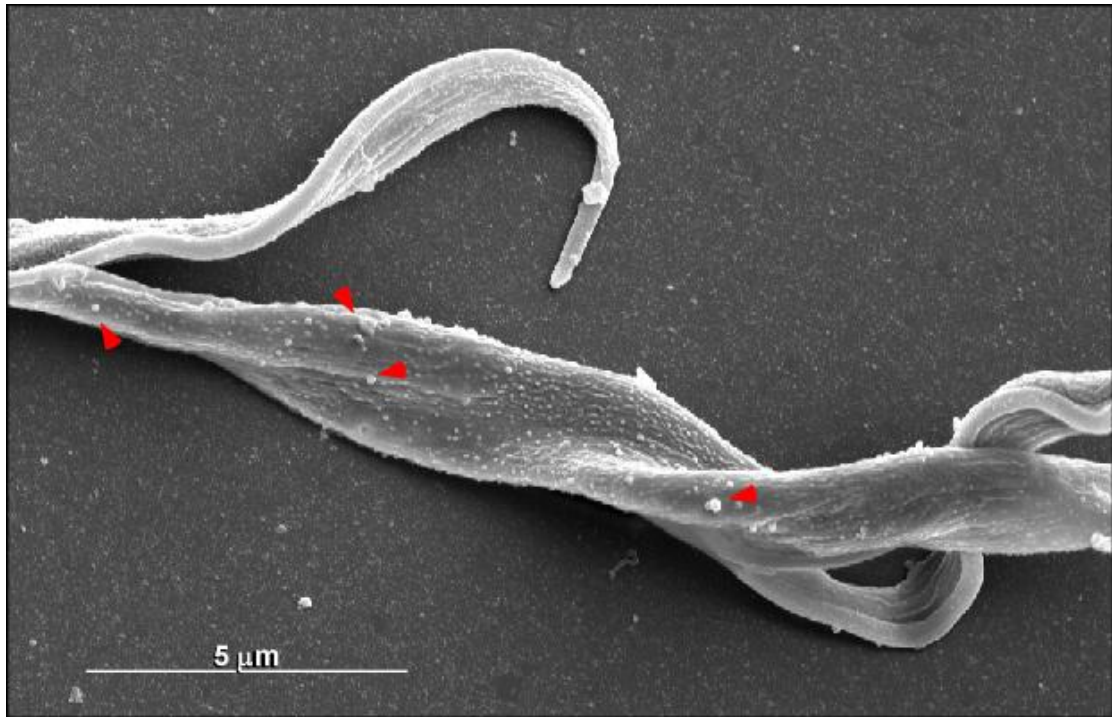

**S7 Fig. Exosome detection by SEM of *SEC63* silenced cells.** Cells carrying the *SEC63* construct were silenced for 2 days and then fixed and visualized under EM. The scale bar is indicated. Exosomes are marked with arrowheads.
