# Supplementary material for: Exosome secretion affects social motility in Trypanosoma brucei
Source: PubMed Central journal article supplement (PMC5352147; doi:10.1371/journal.ppat.1006245), 2017-03-03
Supplement: ppat.1006245.s009.pdf [file ppat.1006245.s009.pdf]

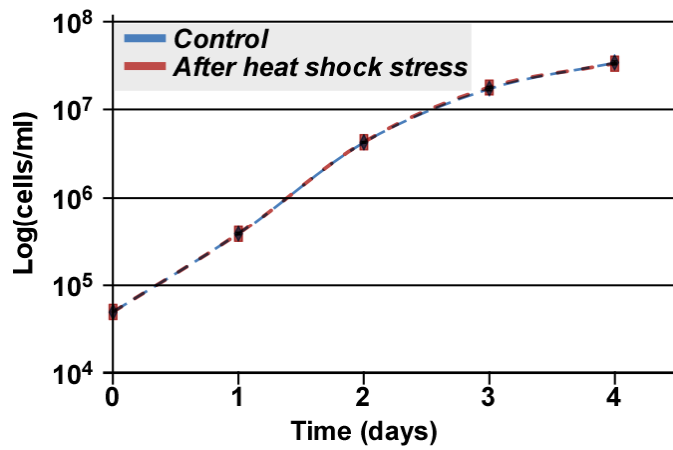

**S9 Fig. Cells continue to grow normally after heat shock.** Cells were subjected to heat shock (37°C for 40 min) and then returned to 26°C; growth was monitored in comparison to cells which were not subjected to heat-shock.
