# Supplementary material for: Exosome secretion affects social motility in Trypanosoma brucei
Source: PubMed Central journal article supplement (PMC5352147; doi:10.1371/journal.ppat.1006245), 2017-03-03
Supplement: ppat.1006245.s010.pdf [file ppat.1006245.s010.pdf]

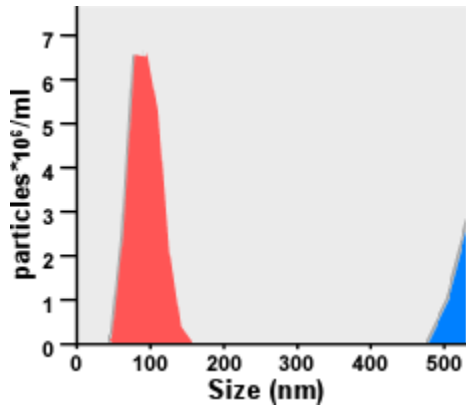

**S10 Fig. NanoSight analysis.** Exosomes were prepared from *SmDI* silenced cells ( $10^9$ ) after 2 days of silencing. The exosomes were treated with 0.05% NP40 for one hour and then analyzed by NanoSight instrument. Untreated exosomes (red), and treated exosomes (blue).
