# Supplementary material for: Exosome secretion affects social motility in Trypanosoma brucei
Source: PubMed Central journal article supplement (PMC5352147; doi:10.1371/journal.ppat.1006245), 2017-03-03
Supplement: ppat.1006245.s011.pdf [file ppat.1006245.s011.pdf]

Supplementary Table 1: The oligonucleotides used are listed below.

| Molecule                                                     | Restriction Site | Sequence                                                              | Orientation | Site in the gene | Insert size (bp) |
|--------------------------------------------------------------|------------------|-----------------------------------------------------------------------|-------------|------------------|------------------|
| <b>Oligonucleotide for Affinity Selection of SL RNP-C</b>    |                  |                                                                       |             |                  |                  |
| SL RNA                                                       |                  | 5'-GGAGCUUCUCAUACXXXXA-3' (X denotes a biotinylated 2'-deoxycytidine) | antisense   | 40-54            |                  |
| <b>Oligonucleotides for T7 Opposing Silencing Constructs</b> |                  |                                                                       |             |                  |                  |
| SmE                                                          | XhoI             | 5'-CCG <u>CTC GAG</u> ATG AGC GTC ACA ACA AAG CA-3'                   | sense       | 20-0'            | 380              |
| SmE                                                          | HindIII          | 5'-CCC <u>AAG CTT</u> TAT GCC AAT AGG GTG AAT GAC-3'                  | antisense   | 237-258          | 380              |
| ZC3H41-p58                                                   | XhoI             | 5'-CCG <u>CTC GAG</u> TAA TGG TGA CTG CAG GTA CGG-3'                  | sense       | 416-437          | 518              |
| ZC3H41-p58                                                   | HindIII          | 5'-CCC <u>AAG CTT</u> CAA AGC GGA AGC AGA AAA TG-3'                   | antisense   | 896-916          | 518              |
| p72                                                          | XhoI             | 5'-CCG <u>CTC GAG</u> TCC ACA GGG TTC TCA CCA C-3'                    | sense       | 141-160          | 489              |
| p72                                                          | HindIII          | 5'-CCC <u>AAG CTT</u> ATG CCC ATC AAT ACG TCG -3'                     | antisense   | 594-612          | 489              |
| p22                                                          | XhoI             | 5'-CCG <u>CTC GAG</u> TGA GCA GCA CAG TTA GGC -3'                     | sense       | 242 - 259        | 237              |
| p22                                                          | HindIII          | 5'-CCC <u>AAG CTT</u> AGT TCT GTA TCT TCC TCA TTG -3'                 | antisense   | 440 - 461        | 237              |
| NMP                                                          | XhoI             | 5'-CCG <u>CTC GAG</u> ATG GCG ACG GAC GAA CGA TT-3'                   | sense       | 20-0'            | 533              |
| NMP                                                          | HindIII          | 5'-CCC <u>AAG CTT</u> CCC CTT CAT CCC CAC CCG-3'                      | antisense   | 520-540          | 533              |
| VPS36                                                        | XhoI             | 5'-TTT <u>CTC GAG</u> ATT TGA ACT ATG ACG AAG GC-3'                   | sense       | 101-120          | 550              |
| VPS36                                                        | HindIII          | 5'-TTT <u>AAG CTT</u> GCG ATA TTT TGC TGC TTT TG-3'                   | antisense   | 631-650          | 550              |
| Vps24                                                        | XhoI             | 5'-TTT <u>CTC GAG</u> CAA GCG CTG TTG TTA TGA CA-3'                   | sense       |                  |                  |
| Vps24                                                        | HindIII          | 5'-TTT <u>AAG CTT</u> TCA ACT AAC AGT CCC ACG AA-3'                   | antisense   |                  |                  |
| <b>Oligonucleotides for T7 Opposing Silencing Constructs</b> |                  |                                                                       |             |                  |                  |
| ZC3H41-p58                                                   | XbaI             | 5'-GTA CTG <u>TCT AGA</u> ATA AAT CCA CCT CGT TCT ACG G-3'            | sense       | 220-241          | 503              |
| ZC3H41-p58                                                   | MluI             | 5'-TCG TAC <u>ACG CGT</u> GCT CTC CTG AAC AGA TTG CTG G-3'            | antisense   | 699-721          | 503              |
| p58                                                          | HindIII          | 5'-TCG TAC <u>AAG CTT</u> GCT CTC CTG AAC AGA TTG CTG G-3'            | antisense   | 699-723          | 503              |
| Mtr4                                                         | XbaI             | 5'-CCC <u>TCT AGA</u> AAG CGA GTT ATT TAC ACT TCA-3'                  | sense       |                  |                  |
| Mtr4                                                         | MluI             | 5'-CCC <u>ACG CGT</u> TAG CAC GCC TGA AAT TGT-3'                      | antisense   |                  |                  |
| Mtr4                                                         | HindIII          | 5'-CCC <u>AAG CTT</u> TAG CAC GCC TGA AAT TGT-3'                      | antisense   |                  |                  |
| SmD1                                                         | XbaI             | 5'-GCT <u>CTA GAA</u> TGC CCG CGG CCG AGT CAT-3'                      | sense       | 304-323          | 317              |
| SmD1                                                         | MluI             | 5'-CGA <u>CGC GTC</u> TCA TTT GAT CGC TCC GTC CT-3'                   | antisense   | 601-621          | 317              |
| SmD1                                                         | HindIII          | 5'-CCA <u>AGC TTC</u> TCA TTT GAT CGC TCC GTC CT-3'                   | antisense   | 601-621          | 317              |
| <b>Oligonucleotides for YFP/RFP tagging</b>                  |                  |                                                                       |             |                  |                  |
| RAB28                                                        | HindIII          | 5'-CCC <u>AAG CTT</u> CCA TGA GTA GCG ACA GTT CAG A-3'                | sense       |                  |                  |
| RAB28                                                        | NotI             | 5'-CCC GCG GCC GCC ATC ACT GCG CAT TTA CCC T-3'                       | antisense   |                  |                  |
| VPS36                                                        | HindIII          | 5'-TTT <u>AAG CTT</u> CCA TGA GTT CAT GGG AAT CG-3'                   | sense       |                  |                  |
| VPS36                                                        | NotI             | 5'-TTT GCG GCC GCT GAT GCC CGC ATG AGA CC-3'                          | antisense   |                  |                  |
| VPS28                                                        | HindIII          | 5'-CCC <u>AAG CTT</u> CCA TGG AAG TGG CAT TCA CCA T-3'                | sense       |                  |                  |
| VPS28                                                        | NotI             | 5'-CCC GCG GCC GCT TAC GCC TTT GGC CGT CGC G-3'                       | antisense   |                  |                  |
| <b>Oligonucleotides for antibody for p58</b>                 |                  |                                                                       |             |                  |                  |
| ZC3H41-p58                                                   | EcoRI            | 5'-CCC <u>GAA TTC</u> ATG AGC AGC GCG GTA GAT-3'                      | sense       |                  |                  |
| ZC3H41-p58                                                   | HindIII          | 5'-CCC <u>AAG CTT</u> CTA ACT GAA ATC CTC AGA CAA C-3'                | antisense   |                  |                  |
| <b>Oligonucleotides for PTP Tagging</b>                      |                  |                                                                       |             |                  |                  |
| NMP                                                          | HindIII          | 5'-AAA <u>AAG CTT</u> GGA TGG CGA CCG ACG AAC GAT T-3'                | sense       |                  |                  |
| NMP                                                          | Apal             | 5'-TTT GGG CCC TGG TCG TAC ATC ATT TTT TC-3'                          | antisense   |                  |                  |
| p22                                                          | Apal             | 5'-AAA GGG CCC TTA CGC GGT TGT GCA CTG-3'                             | sense       |                  |                  |
| p22                                                          | NotI             | 5'-AAA GCG GCC GCC CCC TCC TCA CCG TTG GTT T-3'                       | antisense   |                  |                  |
| P72                                                          | HindIII          | 5'-AAA <u>AAG CTT</u> GGA TGT ACC ATC GTG GCT ACG-3'                  | sense       |                  |                  |
| P72                                                          | Apal             | 5'-TTT GGG CCC CTC GAT TTC TGC CTG CAT AC-3'                          | antisense   |                  |                  |
| Vps36                                                        | HindIII          | 5'-AAA <u>AAG CTT</u> GGA TGA GTT CAT GGG AAT CGT G-3'                | sense       |                  |                  |
| Vps36                                                        | Apal             | 5'-TTT GGG CCC ACA TTT CAC TGT GTC GGA GC-3'                          | antisense   |                  |                  |
| <b>Oligonucleotides for Primer Extension</b>                 |                  |                                                                       |             |                  |                  |
| TbSL RNA                                                     |                  | 5'-GGG AGC TTC TCA TAC-3'                                             | antisense   | 40-54            |                  |
| TbU3                                                         |                  | 5'-TGC CGT TCA TCG AAC-3'                                             | antisense   | 107-121          |                  |
| TbU4                                                         |                  | 5'-CAA ACT TTC CCC GAA GGA-3'                                         | antisense   | 76-93            |                  |
| <b>Oligonucleotides for Northern</b>                         |                  |                                                                       |             |                  |                  |
| R-VPS36-T7                                                   |                  | 5'-TTA ATA CGA CTC ACT ATA GGG AGA CTC TTT GAT GTT GCC TAC TT-3'      | antisense   |                  |                  |
| antisense T7-Mtr4                                            |                  | 5'-TTA ATA CGA CTC ACT ATA GGG AGA TAG CAC GCC TGA AAT TGT-3'         | antisense   |                  |                  |
