# Supplementary material for: Exosome secretion affects social motility in Trypanosoma brucei
Source: PubMed Central journal article supplement (PMC5352147; doi:10.1371/journal.ppat.1006245), 2017-03-03
Supplement: ppat.1006245.s012.pdf [file ppat.1006245.s012.pdf]

**Supplementary Table 2:** The list of proteins identified by Mass-spectrometry. The list includes data from three independent purifications. The mass spectrometry data were analyzed using the Sequest 3.31 software (J. Eng and J.Yates, University of Washington and Finnigan, San Jose) searching against *T. brucei* TriTryp database version 5 (<http://tritypdb.org/tritypdb/>). To control for the selective affinity selection (-Oligo). The affinity selection protocol was performed using fractions containing the SL RNA complex purified on a FPLC column but in the absence of oligonucleotide. The proteins associated with the beads were separated on a gel for a short time capturing the entire protein population. The gel slice was analyzed by MS.

| experiment Number | Identified Protein Annotation                                                                                                                                                                            | Peptide                                                                                                                                                                                             | Peptide Repeat |         | Accession no.  | Molecular Weight (kDa) |
|-------------------|----------------------------------------------------------------------------------------------------------------------------------------------------------------------------------------------------------|-----------------------------------------------------------------------------------------------------------------------------------------------------------------------------------------------------|----------------|---------|----------------|------------------------|
|                   |                                                                                                                                                                                                          |                                                                                                                                                                                                     | + Oligo        | - Oligo |                |                        |
| experiment 1      | 50S ribosomal protein L7Ae, putative                                                                                                                                                                     | K.ITSIKAK.H                                                                                                                                                                                         | 2              |         | Tb927.4.750    | 16.30                  |
| experiment 1      | 40S ribosomal protein S6, putative                                                                                                                                                                       | -MKLVNAVYPRNGTVK.Q                                                                                                                                                                                  | 3              |         | Tb927.10.190   | 28.40                  |
| experiment 1      | zinc finger protein family member, putative (ZC3H41)                                                                                                                                                     | K.SFQHIDPTIEK.F<br>R.LLVTNEDYAK.L                                                                                                                                                                   | 2              |         | Tb927.11.1980  | 58.40                  |
| experiment 1      | hypothetical protein, conserved                                                                                                                                                                          | K.SRIPLDK.F                                                                                                                                                                                         | 2              |         | Tb927.8.560    | 64.60                  |
| experiment 1      | serine/threonine protein kinase, putative                                                                                                                                                                | R.LAYSLSR.N                                                                                                                                                                                         | 3              |         | Tb927.11.6990  | 67.10                  |
| experiment 1      | fatty acyl CoA synthetase 1 (ACS1)                                                                                                                                                                       | R.IFETIRKVVESR.L                                                                                                                                                                                    | 6              |         | Tb927.9.4190   | 78.90                  |
| experiment 1      | hypothetical protein, conserved                                                                                                                                                                          | R.IAELEEKRR.A                                                                                                                                                                                       | 4              |         | Tb927.8.3840   | 80.00                  |
| experiment 1      | hypothetical protein, conserved                                                                                                                                                                          | K.TAPQEHKKAVDDFPDGATR.G                                                                                                                                                                             | 4              |         | Tb927.9.4350   | 94.10                  |
| experiment 1      | ubiquitin-activating enzyme E1, putative (UBA1)                                                                                                                                                          | R.IDINEGRDITVK.E                                                                                                                                                                                    | 4              |         | Tb927.8.2640   | 116.40                 |
| experiment 1      | hypothetical protein, conserved                                                                                                                                                                          | R.LLEETEQEFAPAPYVVR.G                                                                                                                                                                               | 2              |         | Tb927.8.4230   | 119.00                 |
| experiment 1      | Protein of unknown function, putative                                                                                                                                                                    | R.QEYNKNTQR.G<br>R.ETPEGEDEK.F<br>R.QEYNKNTQR.G                                                                                                                                                     | 10             |         | Tb927.5.3290   | 130.00                 |
| experiment 1      | Clustered mitochondria, putative                                                                                                                                                                         | K.GAVAIEKEMLQRVK.D                                                                                                                                                                                  | 3              |         | Tb927.8.4780   | 468.10                 |
| experiment 2      | mitochondrial RNA binding complex 1 subunit (MRB1590)                                                                                                                                                    | K.VSGIGTESIR.F<br>K.VLQITDLAAANPCR.R<br>R.TYVVVDPTAVK.I<br>R.AQEPITPFVER.V<br>R.CFDPDGSFTTVR.R<br>R.SLTINETYQISENVR.C<br>R.VAAEDFILR.S<br>K.GGALTQLPSPGGVCEIQR.G<br>K.EIASNSSLPALNPPGDTASVHFPDVNR.Q | 17             |         | Tb927.3.1590   | 72.60                  |
| experiment 2      | Polyadenylate-binding protein 2 (Poly(A)-binding protein 2) (Poly(A)-binding protein II) (PABII) (Polyadenylate-binding nuclear protein 1) (Nuclear poly(A)-binding protein 1) (PABP2), putative (PABP2) | R.LTAIGLATDEK.G                                                                                                                                                                                     | 2              |         | Tb927.9.10770  | 62.10                  |
| experiment 2      | hypothetical protein, conserved                                                                                                                                                                          | K.YAEVSK.D<br>R.NEEDTELVHK.I<br>R.VVYNTANVDR.S<br>K.SSEEDIEFDYPEAVLESQAQWTLK.Y                                                                                                                      | 7              |         | Tb927.7.7460   | 22.30                  |
| experiment 3      | Protein of unknown function, putative                                                                                                                                                                    | QEYNKNTQR                                                                                                                                                                                           | 1              |         | Tb927.5.3290   | 130.00                 |
| experiment 3      | hypothetical protein, conserved                                                                                                                                                                          | EGLTRGQQAVEVELQGVKESLQLLQK                                                                                                                                                                          | 6              |         | Tb927.5.1180   | 99.10                  |
| experiment 3      | hypothetical protein, conserved                                                                                                                                                                          | RLCLKPFVQQR                                                                                                                                                                                         | 3              |         | Tb927.11.16330 | 103.60                 |
| experiment 3      | zinc finger protein family member, putative (ZC3H41)                                                                                                                                                     | R.NIPFEELEEEGNFKDAAVK.L<br>SEELYLLQSLVAGR                                                                                                                                                           | 8              |         | Tb927.11.1980  | 58.40                  |
| experiment 3      | Nin one binding (NOB1) Zn-ribbon like, putative                                                                                                                                                          | GTNRCLVLR                                                                                                                                                                                           | 3              |         | Tb927.11.10860 | 47.30                  |

| experiment Number | Identified Protein Annotation                                                                    | Peptide                     | Peptide Repeat |         | Accession no.  | Molecular Weight (kDa) |
|-------------------|--------------------------------------------------------------------------------------------------|-----------------------------|----------------|---------|----------------|------------------------|
|                   |                                                                                                  |                             | + Oligo        | - Oligo |                |                        |
| negative control  | phosphoglycerate kinase phosphoglycerate kinase                                                  | SGETEDTYIADLVVALGSGQIK      | 18             |         | Tb927.10.2890  | 46.56                  |
| negative control  | beta tubulin beta tubulin                                                                        | TIGVEDDAFNFFSETGAGK         | 12             |         | Tb927.1.2340   | 49.76                  |
| negative control  | alpha tubulin alpha tubulin                                                                      | NDKLYITLQVASAK              | 5              |         | Tb927.9.10230  | 18.76                  |
| negative control  | GTP-binding nuclear protein rb2, putative GTP-binding nuclear protein rb2, putative              | REIVVQAGQGNQIGSK            | 12             |         | Tb927.1.2330   | 49.67                  |
| negative control  | succinyl-CoA synthetase alpha subunit, putative succinyl-CoA synthetase alpha subunit, putative  | EIQVALFSATPDDVLELTKK        | 7              |         | Tb927.9.4680   | 45.33                  |
| negative control  | amidinotransferase, putative amidinotransferase, putative                                        | DVNGFLVGGASLKPFDIHK         | 7              |         | Tb927.11.5520  | 26.80                  |
| negative control  | p25-alpha, putative p25-alpha, putative                                                          | SINPDEAVAYGAAVQAFILTGKK     | 18             |         | Tb927.11.11330 | 71.36                  |
| negative control  | heat shock 70 kDa protein, mitochondrial precursor, putative heat shock 70 kDa protein, mitoch   | ALIGVVSNPVNSVVPVIASEVLKK    | 5              |         | Tb927.10.2560  | 33.17                  |
| negative control  | paraflagellar rod component, putative paraflagellar rod component, putative                      | KAGSTYLNLPVFGTVAEAVK        | 7              |         | Tb927.3.2230   | 31.44                  |
| negative control  | glyceraldehyde 3-phosphate dehydrogenase, glycosomal glyceraldehyde 3-phosphate dehydrogenase,   | GVNPDEAVALGAATLGGVLR        | 10             |         | Tb927.6.3740   | 71.43                  |
| negative control  | S-adenosylmethionine synthetase, putative S-adenosylmethionine synthetase, putative              | AFQTNAAAFVK                 | 2              |         | Tb927.8.6750   | 19.25                  |
| negative control  | heat shock 70 kDa protein, putative heat shock 70 kDa protein, putative                          | IGGIGTVPVGR                 | 3              |         | Tb927.10.2090  | 49.07                  |
| negative control  | Nitroreductase family, putative Nitroreductase family, putative                                  | FFADKPDEATLSPEMKEHYEFK      | 4              |         | Tb927.9.13785  | 11.07                  |
| negative control  | Thioredoxin-like, putative Thioredoxin-like, putative                                            | AFNGQPQHLSR                 | 2              |         | Tb927.10.6070  | 14.56                  |
| negative control  | glycerol-3-phosphate dehydrogenase [NAD+], glycosomal glycerol-3-phosphate dehydrogenase [NAD+]  | GAVFGSGAFGTALAVLAK          | 6              |         | Tb927.8.3530   | 37.78                  |
| negative control  | 2-amino-3-ketobutyrate coenzyme A ligase, putative 2-amino-3-ketobutyrate coenzyme A ligase,     | SVGSLVSPVVIHGEVLLPGLGVIEAAK | 4              |         | Tb927.4.1300   | 41.99                  |
| negative control  | translationally controlled tumor protein (TCTP), putative translationally controlled tumor       | LGFLTTPSNLGTTR              | 6              |         | Tb927.9.6250   | 41.57                  |
| negative control  | Eukaryotic initiation factor 4A-1 Eukaryotic initiation factor 4A-1                              | KLNNIHTILPVLNHVVR           | 8              |         | Tb927.10.6400  | 59.47                  |
| negative control  | arginine kinase arginine kinase                                                                  | AVGVIPSTQGK                 | 5              |         | Tb927.6.4280   | 39.02                  |
| negative control  | Double RNA binding domain protein 3 Double RNA binding domain protein 3                          | SINPDEAVAYGAAVQAHIVSGGK     | 2              |         | Tb927.7.710    | 70.17                  |
| negative control  | Co-chaperone protein P23 Co-chaperone protein P23                                                | VLLGATNPADSLPGTIR           | 2              |         | Tb927.11.16130 | 16.85                  |
| negative control  | kinetoplastid membrane protein 11-5 kinetoplastid membrane protein 11-5                          | ILGDFGVPTR                  | 2              |         | Tb927.10.1400  | 23.35                  |
| negative control  | hypoxanthine-guanine phosphoribosyltransferase hypoxanthine-guanine phosphoribosyltransferase    | AVILFGEQHTK                 | 2              |         | Tb927.7.2980   | 21.23                  |
| negative control  | elongation factor 1-alpha elongation factor 1-alpha                                              | VDFNVPLDDGNITNDYR           | 3              |         | Tb927.1.710    | 45.22                  |
| negative control  | mitochondrial malate dehydrogenase mitochondrial malate dehydrogenase                            | GKLTIPANVNDVSTK             | 4              |         | Tb927.11.9590  | 48.42                  |
| negative control  | enolase enolase                                                                                  | SREPSYFVHSK                 | 2              |         | Tb927.6.4140   | 13.00                  |
| negative control  | DHH1 DHH1                                                                                        | LLGVTLDLGLR                 | 4              |         | Tb927.10.15410 | 33.69                  |
| negative control  | universal minicircle sequence binding protein 2 universal minicircle sequence binding protein 2  | VDTQLPHIQALLVPTR            | 4              |         | Tb927.10.3990  | 46.44                  |
| negative control  | universal minicircle sequence binding protein 1 universal minicircle sequence binding protein 1  | IATGVDGLVR                  | 2              |         | Tb927.11.1890  | 36.00                  |
| negative control  | chaperonin HSP60, mitochondrial precursor chaperonin HSP60, mitochondrial precursor              | GLQYYDISAK                  | 2              |         | Tb927.3.1120   | 24.39                  |
| negative control  | succinyl-CoA ligase [GDP-forming] beta-chain, putative succinyl-CoA ligase [GDP-forming] beta-ch | FVIGGPHGDAGLTGR             | 2              |         | Tb927.6.4840   | 43.51                  |
| negative control  | heat shock protein, putative heat shock protein, putative                                        | GVVVFVAISNDADKAK            | 3              |         | Tb927.7.4520   | 22.30                  |
| negative control  | paraflagellar rod component, putative paraflagellar rod component, putative                      | LNDVIPNATTISR               | 2              |         | Tb927.10.11300 | 14.32                  |
| negative control  | glycosomal malate dehydrogenase glycosomal malate dehydrogenase                                  | AAENAAEQIK                  | 2              |         | Tb927.10.7410  | 44.88                  |
| negative control  | Serine-threonine kinase receptor-associated protein, putative Serine-threonine kinase receptor-  | HIDTAIYKNEESAGR             | 4              |         | Tb927.11.4700  | 30.97                  |
| negative control  | prostaglandin f synthase prostaglandin f synthase                                                | YQSLTNQSVLGDPEHLR           | 3              |         | Tb927.10.10890 | 80.71                  |
| negative control  | triosephosphate isomerase triosephosphate isomerase                                              | EPNAPADAAAGGAAAGGGR         | 4              |         | Tb927.10.6060  | 21.82                  |
| negative control  | S-adenosylhomocysteine hydrolase, putative S-adenosylhomocysteine hydrolase, putative            | NAGLSGVVDR                  | 3              |         | Tb927.4.2740   | 16.32                  |
| negative control  | heat shock protein 70 heat shock protein 70                                                      | NITPNVTQLSIQNLVQNFNGIK      | 5              |         | Tb927.9.8740   | 36.96                  |
| negative control  | phosphomannose isomerase, putative phosphomannose isomerase, putative                            | HAEALQEHAEELR               | 2              |         | Tb927.11.14780 | 46.45                  |
| negative control  | nucleoside diphosphate kinase nucleoside diphosphate kinase                                      | EAGTYKVER                   | 2              |         | Tb927.8.6060   | 43.71                  |
